# Supplementary material for: Variation of sodium coordination during the hydration processes of layered sodium disilicates as studied by 23Na MQMAS and 1H↔23Na CP/MAS NMR spectroscopyElectronic supplementary information (ESI) available: XRD patterns of SKS-5 and SKS-6 samples after different hydration times, and 1H–1H NOESY spectra of SKS-5 and SKS-6 hydrated for six months. See http://www.rsc.org/suppdata/jm/b2/b209578e/
Source: Royal Society of Chemistry journal article supplement (doi:10.1039/b209578e), 2003-01-23
Supplement: b209578e.doc [file b209578e.doc]

**Revised manuscript No.** B209578E

**Variation of Sodium Coordination during the Hydration Processes of Layered Sodium Disilicates as Studied by 23Na MQMAS and 1H-23Na CP/MAS NMR Spectroscopy**

**Xuanjun Ai*a*, Lei Chen***a*,**Jinxiang Dong** *b*, **Chaohui Ye***a* **and Feng Deng***, *a*

Figure 1 XRD powder patterns of the series SKS-5 samples as a function of hydration time: (a) as received; (b) 10 days; (c) 3 months; (d) 6 months.

Figure 2 XRD powder patterns of the series SKS-6 samples as a function of hydration time: (a) as received; (b) 3 months; (c) 6 months.


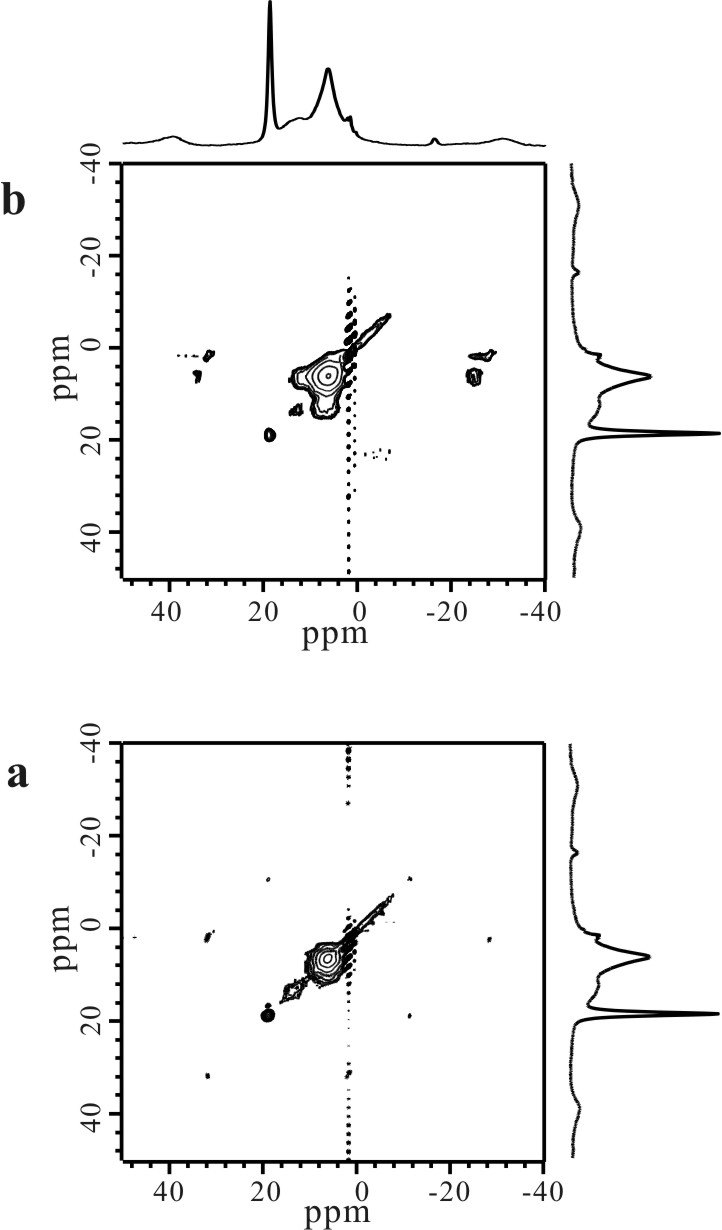


Figure 3 1H-1H NOESY spectra of the six months hydrated sample of SKS-5 with different mixing time: (a) 1ms; (b) 20ms.


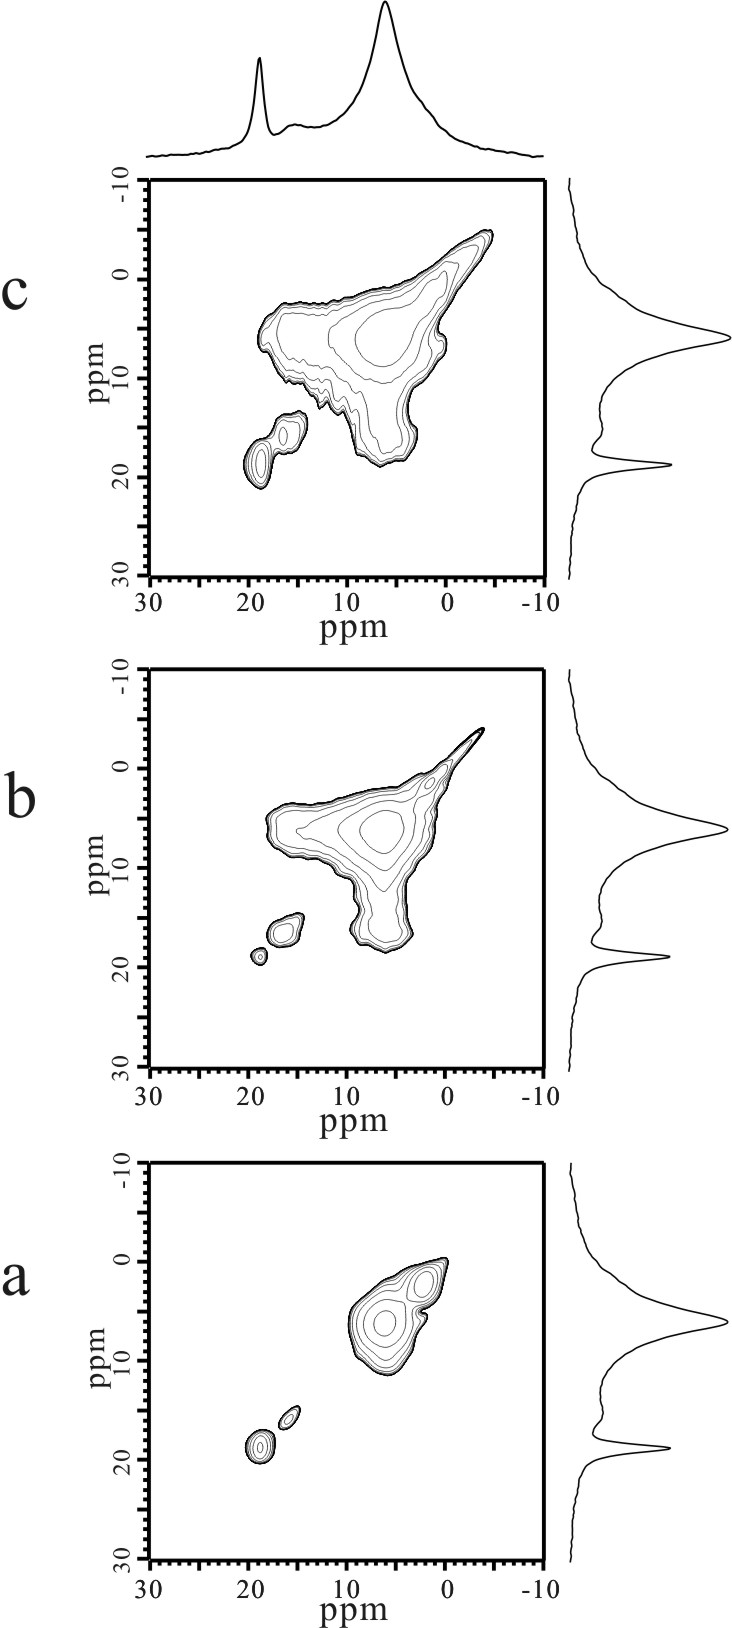


Figure 4 1H-1H NOESY spectra of the six months hydrated sample of SKS-6 with different mixing time: (a) 0.5ms; (b) 20ms; (c) 150ms.
